# Supplementary material
Source: PubMed Central journal article supplement (PMC5399949)
Supplement: ry161315suppa1.pdf [file ry161315suppa1.pdf]

**Table E1. Baseline Characteristics of Patients according to Univariate Cox Regression**

| Characteristic                       | All Patients (n = 256) | Alive Patients (n = 163) | Dead Patients (n = 93) | P Value for Alive vs Dead Patients | Hazard Ratio | 95% CI       | P Value for Hazard Ratio |
|--------------------------------------|------------------------|--------------------------|------------------------|------------------------------------|--------------|--------------|--------------------------|
| Age (y)                              | 67 (52–75)             | 63 (48–71)               | 72 (65–78)             | <.001                              | 1.034        | 1.021, 1.047 | <.001                    |
| Sex                                  |                        |                          |                        | .013                               | 1.736        | 1.153, 2.614 | .008                     |
| No. of women                         | 143                    | 101                      | 42                     |                                    |              |              |                          |
| No. of men                           | 113                    | 62                       | 51                     |                                    |              |              |                          |
| Body surface area (m <sup>2</sup> )* | 1.78 ± 0.21            | 1.87 ± 0.22              | 1.84 ± 0.24            | .37                                | 0.597        | 0.245, 1.454 | .26                      |
| Race†                                |                        |                          |                        | .168                               |              |              |                          |
| African                              | 9                      | 8                        | 1                      |                                    | ...          | ...          | ...                      |
| Asian                                | 5                      | 4                        | 1                      |                                    | ...          | ...          | ...                      |
| Caribbean                            | 13                     | 10                       | 3                      |                                    | ...          | ...          | ...                      |
| Caucasian                            | 213                    | 127                      | 86                     |                                    | 2.789        | 1.288, 6.042 | .009                     |
| Subcontinental                       | 15                     | 12                       | 3                      |                                    | ...          | ...          | ...                      |
| Middle East                          | 1                      | 1                        | 0                      |                                    | ...          | ...          | ...                      |
| RV EDVI (mL · m <sup>-2</sup> )‡     | 105 (77–123)           | 96 (77–115)              | 110 (82–138)           | .004                               | 1.008        | 1.003, 1.013 | .002                     |
| RV ESVI (mL · m <sup>-2</sup> )‡     | 61 (40–84)             | 53 (37–75)               | 67 (46–98)             | <.001                              | 1.009        | 1.004, 1.014 | <.001                    |
| RV ejection fraction (%)*            | 40 ± 14                | 42 ± 14                  | 37 ± 12                | <.001                              | 0.975        | 0.961, 0.990 | .001                     |
| SV/RV ESV (%) <sup>+</sup>           | 0.65 (0.44–0.99)       | 0.74 (0.48–1.13)         | 0.58 (0.37–0.89)       | .001                               | 0.391        | 0.229, 0.669 | <.001                    |
| 6MWD (m) <sup>†§</sup>               | 258 (96–360)           | 302 (120–395)            | 180 (90–300)           | <.001                              | 0.997        | 0.995, 0.998 | <.001                    |
| Hemodynamic parameters <sup>‡</sup>  |                        |                          |                        |                                    |              |              |                          |
| mPAP (mm Hg)                         | 44 (32–54)             | 43 (31–54)               | 47 (36–55)             | .09                                | 1.009        | 0.995, 1.023 | .20                      |
| Cardiac index                        | 2.3 (1.9–2.9)          | 2.3 (1.9–2.9)            | 2.3 (1.9–2.9)          | .78                                | 0.963        | 0.775, 1.197 | .73                      |
| PVR (U)                              | 7.0 (3.9–11.2)         | 6.1 (3.2–11.0)           | 7.4 (5.2–11.6)         | .08                                | 1.023        | 0.988, 1.060 | .20                      |
| mRAP                                 | 10 (6–14)              | 10 (6–13)                | 12 (8–16)              | .003                               | 1.065        | 1.026, 1.106 | <.001                    |
| mRV/EDP                              | 10 (7–15)              | 10 (6–14)                | 12 (8–16)              | .004                               | 1.061        | 1.024, 1.100 | .001                     |
| PCWP                                 | 12 (8–16)              | 11 (8–16)                | 13 (10–16)             | .17                                | 1.081        | 0.889, 1.314 | .44                      |
| WHO functional class <sup>  </sup>   |                        |                          |                        | <.001                              | 2.105        | 1.505, 2.945 | <.001                    |
| I                                    | 3                      | 3                        | 0                      |                                    |              |              |                          |

|                         |     |     |    |      |       |              |       |
|-------------------------|-----|-----|----|------|-------|--------------|-------|
| II                      | 43  | 36  | 7  |      |       |              |       |
| III                     | 163 | 104 | 59 |      |       |              |       |
| IV                      | 47  | 20  | 27 |      |       |              |       |
| Clinical classification |     |     |    | .422 |       |              |       |
| Group 1                 | 88  | 54  | 34 |      | 1.038 | 0.810, 1.330 | .77   |
| Group 1.1               | 57  | 36  | 21 |      | 0.977 | 0.777, 1.230 | .85   |
| Group 1.2               | 3   | 1   | 2  |      | 1.187 | 1.018, 1.384 | .03   |
| Group 1.3               | 1   | 1   | 0  |      | ...   | ...          | ...   |
| Group 1.4               | 25  | 16  | 9  |      | 0.981 | 0.791, 1.216 | .76   |
| Group 1'                | 2   | 0   | 2  |      | 1.009 | 0.999, 1.018 | .07   |
| Group 2                 | 43  | 27  | 16 |      | 1.035 | 0.830, 1.291 | .76   |
| Group 3                 | 15  | 2   | 13 |      | 1.423 | 1.239, 1.633 | <.001 |
| Group 4                 | 106 | 78  | 28 |      | 0.681 | 0.512, 0.907 | .009  |
| Group 5                 | 4   | 2   | 2  |      | 1.030 | 0.864, 1.229 | .74   |

Note.—mPAP = mean pulmonary artery pressure, mRAP = mean right atrial pressure, mRVEDP = mean RV end-diastolic pressure, PCWP = pulmonary capillary wedge pressure, PVR = pulmonary vascular resistance, RVEDVI = indexed RV end-diastolic volume, RVESVI = indexed RV end-systolic volume, SV/RVESV = stroke volume divided by RV end-systolic volume, U = Woods units, WHO = World Health Organization, 6MWD = 6-minute walk distance.

\* Values are means  $\pm$  standard deviations (normal data).

† Hazard ratios were not calculated for groups with five or fewer deaths.

‡ Values are medians, with interquartile ranges in parentheses (nonnormal data).

§ Excluding 16 subjects who were unable to perform testing.

|| Higher numbers indicate lower functional capacity. Group 1, pulmonary arterial hypertension; group 1.1, idiopathic; group 1.2, heritable; group 1.3, drug and toxin induced; group 1.4, associated with other conditions (except congenital heart disease); group 1', peripheral veno-occlusive disease and/or pulmonary capillary hemangiomatosis; group 2, PH due to left-sided heart disease; group 3, PH due to lung diseases and/or hypoxia; group 4, chronic thromboembolic PH and other pulmonary artery obstructions; group 5, PH with unclear and/or multifactorial mechanisms.

**Table E2. Baseline RV Volumetry and Hemodynamic and Functional Data in Patients with PH according to Diagnostic Subgroup**

| Parameter | Group 1                         |            |            |      |            |            | Group 2, LHD | Group 3, PH Lung | Group 4, CTEPH | Group 5, PH Miscellaneous |
|-----------|---------------------------------|------------|------------|------|------------|------------|--------------|------------------|----------------|---------------------------|
|           | Pulmonary Arterial Hypertension | IPAH       | HPAH       | DPAH | APAH       | PVOD       |              |                  |                |                           |
| Age (y)   | 64 (44–73)                      | 68 (46–74) | 69 (61–77) | 49   | 52 (42–70) | 56 (48–64) | 72 (60–77)   | 70 (69–80)       | 65 (51–72)     | 67 (63–72)                |

|                                       |                             |                             |                            |                   |                         |                  |                         |                      |                             |                         |
|---------------------------------------|-----------------------------|-----------------------------|----------------------------|-------------------|-------------------------|------------------|-------------------------|----------------------|-----------------------------|-------------------------|
| Sex                                   |                             |                             |                            |                   |                         |                  |                         |                      |                             |                         |
| No. of men                            | 32                          | 22                          | 2                          | 0                 | 8                       | 0                | 15                      | 7                    | 56                          | 1                       |
| No. of women                          | 54                          | 35                          | 1                          | 1                 | 17                      | 2                | 28                      | 4                    | 50                          | 3                       |
| 6MWD (m)                              | 243 (96–365)                | 215 (95–360)                | 120 (90–276)               | 309               | 308 (106–371)           | 146 (115–177)    | 180 (80–316)            | 276 (168–330)        | 297 (144–368)               | 45 (26–157)             |
| WHO functional class*                 |                             |                             |                            |                   |                         |                  |                         |                      |                             |                         |
| I                                     | 3                           | 1                           | 0                          | 0                 | 2                       | 0                | 0                       | 0                    | 0                           | 0                       |
| II                                    | 14                          | 8                           | 0                          | 0                 | 6                       | 0                | 7                       | 1                    | 21                          | 0                       |
| III                                   | 51                          | 33                          | 2                          | 1                 | 15                      | 1                | 23                      | 6                    | 67                          | 4                       |
| IV                                    | 16                          | 13                          | 1                          | 0                 | 2                       | 1                | 5                       | 4                    | 18                          | 0                       |
| Hemodynamic parameters                |                             |                             |                            |                   |                         |                  |                         |                      |                             |                         |
| mPAP (mm Hg)                          | 49 (39–58) <sup>†</sup>     | 50 (42–59) <sup>‡</sup>     | 34 (34–38)                 | 66                | 42 (31–50)              | 54 (54–55)       | 32 (27–43)              | 38 (33–44)           | 46 (35–54) <sup>†</sup>     | 49 (47–50)              |
| mRAP (mm Hg)                          | 9 (5–15)                    | 10 (5–15)                   | 7 (5–15)                   | 28 <sup>†</sup>   | 8 (6–15)                | 7 (5–8)          | 15 (12–17) <sup>‡</sup> | 6 (5–9) <sup>‡</sup> | 10 (6–13) <sup>‡</sup>      | 16 (14–19)              |
| PCWP (mm Hg)                          | 10 (7–14) <sup>†</sup>      | 10 (7–14)                   | 8 (8–12)                   | 15                | 10 (8–13)               | 9 (8–9)          | 17 (16–22) <sup>§</sup> | 14 (11–17)           | 10 (8–13) <sup>†</sup>      | 19 (15–23)              |
| PVR (U)                               | 8.2 (5.3–12.2) <sup>‡</sup> | 9.0 (5.6–13.9) <sup>§</sup> | 9.1 (5.1–10.0)             | 20.4 <sup>§</sup> | 7.0 (2.8–10.7)          | 13.1 (11.0–15.2) | 3.3 (2.0–5.9)           | 5.7 (3.2–6.6)        | 8.3 (4.5–12.1) <sup>†</sup> | 7.8 (5.0–10.5)          |
| RVEDP (mm Hg)                         | 10 (6–16)                   | 10 (6–16)                   | 8 (7–10)                   | 20                | 10 (6–14)               | 7 (6–8)          | 12 (8–16)               | 10 (8–12)            | 11 (7–14)                   | 19 (14–23) <sup>‡</sup> |
| Cardiac index (L/min/m <sup>2</sup> ) | 2.4 (2.0–3.0) <sup>§</sup>  | 2.4 (2.0–2.9) <sup>§</sup>  | 2.0 (1.9–5.4) <sup>§</sup> | 1.5               | 2.8 (2.2–3.3)           | 2.4 (2.1–2.6)    | 2.4 (2.1–2.9)           | 2.5 (2.4–3.0)        | 2.2 (1.9–2.8) <sup>§</sup>  | 2.2 (1.7–2.6)           |
| Heart rate (beats/min)                | 74 (66–85)                  | 75 (68–86)                  | 70 (58–72)                 | 72                | 73 (63–84) <sup>‡</sup> | 107 (98–115)     | 68 (60–80)              | 76 (66–79)           | 76 (67–87) <sup>§</sup>     | 75 (69–85)              |
| Cardiovascular MR measurements        |                             |                             |                            |                   |                         |                  |                         |                      |                             |                         |
| RVEDVI (mL)                           | 104 (77–124)                | 107 (75–129)                | 94 (78–175)                | 103               | 104 (88–120)            | 74 (71–76)       | 81 (74–109)             | 83 (73–110)          | 104 (80–131) <sup>+</sup>   | 87 (67–117)             |
| RVESVI (mL)                           | 63 (45–82)                  | 67 (46–94)                  | 45 (40–85)                 | 51                | 61 (38–75)              | 47 (47–47)       | 44 (31–56)              | 49 (39–64)           | 70 (43–95) <sup>†</sup>     | 41 (34–65)              |
| RV ejection fraction (%)              | 38 (31–49)                  | 34 (27–42) <sup>†</sup>     | 51 (46–52)                 | 50                | 48 (37–57)              | 36 (33–39)       | 50 (44–57)              | 44 (38–49)           | 34 (27–46) <sup>†</sup>     | 49 (42–51)              |
| SV/RVESV (%)                          | 62 (44–94)                  | 52 (37–72) <sup>†</sup>     | 103 (88–107)               | 101               | 93 (58–132)             | 57 (49–64)       | 99 (80–132)             | 80 (60–96)           | 50 (37–86) <sup>†</sup>     | 95 (78–104)             |
| 3D motion (PC)                        | 9 (6–15)                    | 9 (6–14)                    | 11 (6–16)                  | 15 (9–20)         | 9 (5–15)                | 9 (5–12)         | 11 (6–16)               | 10 (6–16)            | 10 (6–16)                   | 11 (7–17)               |
| Mortality rate (%)                    | 39                          | 37                          | 67                         | 0                 | 36                      | 100              | 28 <sup>†</sup>         | 92                   | 26 <sup>†</sup>             | 50                      |
| No. of deaths                         | 34/88                       | 21/57                       | 2/3                        | 0/1               | 9/25                    | 2/2              | 12/43                   | 11/12                | 28/106                      | 2/4                     |

Note.—According to reference 1. Unless indicated otherwise, values are medians, with interquartile ranges in parentheses. Survival models were adjusted for RV ejection fraction. APAH = PH associated with another condition, CTEPH = chronic thromboembolic PH, DPAH = drug- and toxin-induced pulmonary arterial hypertension, HPAH = hereditary pulmonary arterial hypertension, IPAH = idiopathic PH, LHD = left-sided heart disease, PC = principal component units, PCWP = pulmonary capillary wedge pressure, PVOD = pulmonary veno-occlusive disease, PVR = pulmonary vascular resistance, mPAP = mean pulmonary artery pressure, mRAP = mean right atrial pressure, RVEDVI = indexed RV end-diastolic volume, RVEDP = RV end-diastolic pressure, RVESVI = indexed RV end-systolic volume, SV/RVESV = stroke volume divided by RV end-systolic volume, U = Woods units, WHO = World Health Organization, 6MWD = six-minute walk distance.

\* Higher numbers indicate lower functional capacity.

† Significant,  $P < .001$ .

‡ Significant,  $P < .01$ .

§ Significant  $P < .05$ .

**Table E3. Baseline Characteristics of Group 4 Patients Categorized according to Subsequent Pulmonary Endarterectomy**

| Variable                              | Pulmonary Endarterectomy | No Pulmonary Endarterectomy | P Value |
|---------------------------------------|--------------------------|-----------------------------|---------|
| Age (y)                               | 64.6 (50.7–69.2)         | 64.9 (51.2–73.2)            | .31     |
| Sex                                   |                          |                             | .36     |
| No. of men                            | 22                       | 34                          |         |
| No. of women                          | 24                       | 25                          |         |
| WHO functional class                  |                          |                             | .09     |
| I                                     | 0                        | 0                           |         |
| II                                    | 6                        | 15                          |         |
| III                                   | 30                       | 36                          |         |
| IV                                    | 10                       | 8                           |         |
| Hemodynamic parameters                |                          |                             |         |
| mPAP (mm Hg)                          | 48.5 (42.3–55.8)         | 43.0 (29.5–52.0)            | .01     |
| mRAP (mm Hg)                          | 10.0 (7.0–13.8)          | 10 (6.0–12.0)               | .55     |
| PCWP (mm Hg)                          | 11.0 (9.3–14.8)          | 10.0 (7.5–12.0)             | .22     |
| PVR (U)                               | 9.5 (5.4–12.3)           | 7.0 (3.9–11.7)              | .09     |
| RVEDP (mm Hg)                         | 10.0 (8.0–15.0)          | 11.0 (7.0–13.5)             | .46     |
| Cardiac index (L/min/m <sup>2</sup> ) | 2.1 (1.9–2.8)            | 2.2 (1.9–2.8)               | .50     |
| Heart rate (beats/min)                | 79 (68–87)               | 74 (65–87)                  | .36     |
| Cardiovascular MR measurements        |                          |                             |         |
| RVEDVI (mL/m <sup>2</sup> )           | 102.9 (77.4–120.7)       | 108.8 (84.5–135.0)          | .24     |
| RVESVI (mL/m <sup>2</sup> )           | 68.5 (42.9–88.6)         | 74.4 (44.1–97.5)            | .47     |
| RV ejection fraction (%)              | 35.0 (27.3–44.2)         | 33.4 (26.5–47.9)            | >.99    |
| SV/RV ESV (%)                         | 53.7 (37.6–79.4)         | 50.1 (36.0–92.0)            | >.99    |
| Mortality rate                        |                          |                             | .10     |
| No. of deaths*                        | 8/46 (17)                | 19/59 (32)                  |         |
| Hazard ratio                          | 0.511 (0.230–1.134)      | 1                           |         |

Note.—Unless indicated otherwise, values are medians, with interquartile ranges in parentheses. mPAP = mean pulmonary artery pressure, mRAP = mean right atrial pressure, PCWP = pulmonary capillary wedge pressure, PVR = pulmonary vascular resistance, RVEDP = RV end-diastolic pressure, RVEDVI = indexed RV end-diastolic volume, RVESVI = indexed RV end-systolic volume, SV/RVESV = stroke volume divided by RV end-systolic volume, U = Woods units, WHO = World Health Organization.

\* Numbers in parentheses are percentages.

**Table E4. Baseline Characteristics of Patients with PH Who Could and Who Could Not Perform the 6-Minute Walk Test**

| Variable                              | Performed Test   | Unable to Perform Test | P Value |
|---------------------------------------|------------------|------------------------|---------|
| Age (y)                               | 67 (51–74)       | 69 (55–72)             | .59     |
| Sex                                   |                  |                        | .13     |
| No. of men                            | 109              | 4                      |         |
| No. of women                          | 131              | 12                     |         |
| WHO functional class                  |                  |                        | .01     |
| I                                     | 3                | 0                      |         |
| II                                    | 41               | 2                      |         |
| III                                   | 157              | 6                      |         |
| IV                                    | 39               | 8                      |         |
| Hemodynamic parameters*               |                  |                        |         |
| mPAP (mm Hg)                          | 46 (33–54)       | 36 (27–42)             | .02     |
| mRAP (mm Hg)                          | 10 (7–14)        | 11 (6–15)              | .97     |
| PCWP (mm Hg)                          | 12 (8–15)        | 14 (10–17)             | .29     |
| PVR (U)                               | 7.0 (4.0–11.4)   | 5.2 (2.7–9.9)          | .13     |
| RVEDP (mm Hg)                         | 10 (7–15)        | 12 (8–14)              | .72     |
| Cardiac index (L/min/m <sup>2</sup> ) | 2.3 (1.9–2.9)    | 2.3 (1.8–2.9)          | .77     |
| Heart rate (beats/min)                | 75 (65–85)       | 72 (68–81)             | .76     |
| Cardiovascular MR measurements*       |                  |                        |         |
| RVEDVI (mL/m <sup>2</sup> )           | 102 (77–124)     | 84 (68–111)            | .20     |
| RVESVI (mL/m <sup>2</sup> )           | 62 (41–84)       | 44 (30–68)             | .08     |
| RV ejection fraction (%)              | 39 (30–49)       | 50 (38–60)             | .04     |
| SV/RVESV (%)                          | 0.64 (0.42–0.97) | 0.99 (0.61–1.50)       | .04     |
| Mortality rate (%)                    | 35               | 50                     | .05     |
| No. of deaths                         | 85/240           | 8/16                   |         |

Note.—mPAP = mean pulmonary artery pressure, mRAP = mean right atrial pressure, PCWP = pulmonary capillary wedge pressure, PVR = pulmonary vascular resistance, RVEDP = RV end-diastolic pressure, RVEDVI = indexed RV end-diastolic volume, RVESVI = indexed RV end-systolic volume, SV/RVESV = stroke volume/RV end-systolic volume, U = Woods units, WHO = World Health Organization.

\* Values are medians, with interquartile ranges in parentheses.

## Reference

1. Simonneau G, Gatzoulis MA, Adatia I, et al. Updated clinical classification of pulmonary hypertension. *J Am Coll Cardiol* 2013;62(25 Suppl):D34–D41.
